# Supplementary material for: Relative Contribution of Amyloid-β Plaque Associated And Plaque Distant Microglia To Alzheimer’s Disease (AD) Progression
Source: Research Square preprint supplement (doi:10.21203/rs.3.rs-876995/v1), 2021-09-20
Supplement: Supplementary file 1 [file 496ee0b7d5b245dc9163907a.xlsx]

## Sheet: S6-PCMs-specific-genes
Table S6: Differentially expressed genes in PCM%CM excluding DEGs in PAM%CM, related to Figure 5D
		Pseudocounts
Genes	GeneID	ct_4m_1037	ct_4m_1038	ct_4m_1039	ct_4m_1135	ct_8m_1087	ct_8m_1090	ct_8m_1115	ct_8m_1116	ct_12m_1100	ct_12m_1101	ct_12m_1170	ct_12m_1171	pa_4m_1130	pa_4m_1192	pa_4m_1193	pa_4m_1212	pa_8m_1088	pa_8m_1089	pa_8m_1129	pa_8m_1190	pa_12m_1032	pa_12m_1033	pa_12m_1107	pa_12m_1108	pl_8m_1088	pl_8m_1089	pl_8m_1129	pl_8m_1190	pl_12m_1032	pl_12m_1033	pl_12m_1107	pl_12m_1108
Gp49a	14727	0	0	0	0	10.9372	0	0.00372739	0.0121437	3.55871	0.0215777	0	0	0	0	0	25.7203	0.0234376	0	0	0.0183812	0.0332939	0.00523687	4.70805	0	0.125072	40.0008	0.0628193	0.115729	60.9365	132.307	69.4274	0
Zfp607	545938	4.40276	0	6.91472	5.68354	2.97331	17.7748	0.00602653	1.09484	0	0.0355393	0.98627	0	56.8444	0	0	0	129.861	63.2972	67.1385	179.922	0.056808	132.595	235.342	8.42687	22.1119	7.70513e-06	0.060762	0.111643	0	0.107522	153.026	4.14398
Zfp808	630579	0	1.81857	0	0	0	0	0.00367022	1.07759	9.97451	1.13938	0	0	63.5975	175.127	105.755	74.8553	87.313	3.96125	56.1003	0.0306917	0.0565136	83.6406	74.9734	1.85038	0.119027	7.62145e-06	53.7963	0.110205	0	0.106145	19.3871	81.5997
Abcc9	20928	0.8199	7.19941	0	37.8571	0.987431	4.5818	0.00814404	0.026984	12.9885	1.1881	89.1545	0	124.305	126.778	117.044	166.259	132.102	223.424	110.372	23.6134	0.057393	188.704	18.7065	203.064	0.119769	7.66098e-06	0.0603782	14.1273	0	130.27	18.2595	4.14453
Tstd2	272027	422.464	293.024	319.703	112.328	504.683	193.909	240.954	315.588	225.296	190.516	143.541	189.873	724.65	513.733	395.497	378.809	399.611	256.489	668.749	1023.26	1083.11	646.722	424.478	394.763	292.291	90.0017	209.239	426.234	596.375	268.447	257.588	196.869
Egr4	13656	2113.8	1600.76	2066.22	698.65	1578.47	2241.31	1586.6	1316.96	1252.23	3917.61	1443.37	1588.94	1162.13	921.514	843.881	687.595	1067.73	734.772	987.934	429.717	715.385	1402.59	1366.28	1219.14	1089.83	1075.02	1125.27	418.802	528.445	626.802	2145.84	1010.79
Efnb3	13643	1042.37	1417.17	1147.57	1352.03	1597.31	1503.43	1824.48	1015.27	1967.26	1877.71	1704.72	1530.98	1476.26	1468.36	1690.6	1990.47	3999.04	2679.48	2168.12	2989.55	1563.17	2415.52	2310.83	2762.55	1093.78	872.016	986.235	1538.05	2233.65	1228.11	724.879	1343.79
Casp8	12370	732.435	688.257	700.582	724.182	862.613	495.9	485.988	584.117	345.735	229.987	192.048	422.717	847.985	663.215	999.646	858.571	915.984	610.534	1142.49	999.733	992.651	682.43	1022.36	665.476	875.442	862.016	617.257	541.268	466.51	849.491	402.353	735.284
Wscd1	216881	1710.67	2312.52	2748.05	2079.97	2434.14	2170.18	2254.32	2799.68	2195.15	2604.69	1976.96	1854.76	2675.98	2609.39	2355.14	2697.84	3434.65	2603.11	2766.96	3167.44	3600.49	3255.03	2765.31	3045.47	2095.27	1740.03	929.95	3476.87	3375.46	1668.76	2908.39	2450.94
Trp53inp2	68728	3429.32	3040.56	3073.67	1522.9	4017.58	3282.06	3103.77	4552.01	2404.85	2717.42	2799.62	2629.24	4497.23	4329.44	4463.94	3258.65	5394.34	4060.59	4899.23	2942.44	3902.73	4162.9	4433.31	4665.02	4148.88	4113.08	3202.3	3096.66	3474.35	4123.59	4919.89	4674.56
Emc2	66736	1838.9	1732.8	1880.71	2243.32	1956.24	1498.79	2171.62	2083.99	1838.09	2183.16	2521.45	2161.56	1245.96	1500.54	1157.27	1327.24	1488.07	1663.71	1355.87	1551.58	1781.56	1413.82	1391.55	1805.67	2054.91	2088.04	1551.73	2060.11	1278.66	1248.42	1815.48	1209.37
